# Supplementary material for: Development of high damping acrylic rubber/sliding graft copolymer composites
Source: Royal Society of Chemistry journal article supplement (doi:10.1039/c8ra04644a), 2018-01-01
Supplement: c8ra04644a1.pdf [file c8ra04644a1.pdf]

## Supporting Information

# Development of high damping acrylic rubber/sliding graft copolymer composites

**Junjun Wang<sup>2</sup>, Wencai Wang<sup>1,2\*</sup>, Xiaoyan Geng<sup>2</sup>, Toshio Nishi<sup>3</sup>, Xiuying Zhao<sup>1,2,\*</sup>,**

**Liqun Zhang<sup>1,2</sup>,**

1. Key Laboratory of Beijing City on Preparation and Processing of Novel Polymer Materials, Beijing University of Chemical Technology, Beijing 100029, P R China
2. Beijing Engineering Research Center of Advanced Elastomer, Beijing, P R China
3. International Department, Tokyo Institute of Technology, 2-12-1 Ookayama, Meguro-ku, Tokyo 152-8552, Japan

Table S1 Comparison about the improvement of  $\tan\delta$ 

| Materials                           | Test method         | Improvement of $\tan\delta$<br>[[ $D_1-D_0/D_0$ ] $\times 100\%$ ] | Reference   |
|-------------------------------------|---------------------|--------------------------------------------------------------------|-------------|
| CPE/NR blends                       | RPA Frequency sweep | 16%                                                                | [1]         |
| NR/ENR layered<br>gradient material | RPA Frequency sweep | 11%                                                                | [2]         |
| <i>cis</i> -polybutadiene<br>rubber | RPA Frequency sweep | 16%                                                                | [3]         |
| NR/ENR/SR<br>composites             | RPA Frequency sweep | 28%                                                                | [4]         |
| ACM/SGC composites                  | RPA Frequency sweep | 59%                                                                | (This work) |

CPE- chlorinated polyethylene; NR- natural rubber; ENR- epoxidized natural rubber; SR- sliding materials; ACM- acrylic rubber; SGC- sliding graft copolymer;  $D_1$ -  $\tan\delta$  value of modified rubber;  $D_0$ -  $\tan\delta$  value of pristine rubber

## References

1. N. Phewthongin, P. Saeoui and C. Sirisinha, *Polymer Testing*, 2005, **24**, 227-233.
2. R. Qin, R. Huang and X. Lu, *Materials & Design*, 2018, **149**, 43-50.
3. T. L. Sun, X. L. Gong, W. Q. Jiang, J. F. Li, Z. B. Xu and W. H. Li, *Polymer Testing*, 2008, **27**, 520-526.
4. W. Wang, D. Zhao, J. Yang, T. Nishi, K. Ito, X. Zhao and L. Zhang, *Scientific reports*, 2016, **6**, 22810.
